# Supplementary material for: Distribution and Chemistry of Phoenixin-14, a Newly Discovered Sensory Transmission Molecule in Porcine Afferent Neurons
Source: Preprints.org preprint supplement (doi:10.20944/preprints202307.0350.v1), 2023-07-05
Supplement: Supplementary file 2 [file supplementary]

## Sheet: DRG1
#1	b⁺	b²⁺	Seq.	y⁺	y²⁺	#2
1	116.03422	58.52075	D			14		Sequence: DVQPPGLKVWSDPF, F14-Amidated (-0.98402 Da)
2	215.10263	108.05496	V	1469.77873	735.39300	13		(DRG1)Charge: +2, Monoisotopic m/z: 792.41431 Da (-0.16 mmu/-0.2 ppm), MH+: 1583.82134 Da
3	343.16121	172.08424	Q	1370.71031	685.85879	12		RT: (DRG1)62.7101 min
4	440.21397	220.61063	P	1242.65174	621.82951	11		Identified with: Sequest HT (v1.17); XCorr: (DRG1) 2.40
5	537.26674	269.13701	P	1145.59897	573.30312	10		Fragment match tolerance used for search: 0.02 Da
6	594.28820	297.64774	G	1048.54621	524.77674	9		Fragments used for search: -H₂O; y; -NH₃; y; b; b; -H₂O; b; -NH₃; y
7	707.37227	354.18977	L	991.52474	496.26601	8
8	835.46723	418.23725	K	878.44068	439.72398	7
9	934.53564	467.77146	V	750.34572	375.67650	6
10	1120.61496	560.81112	W	651.27730	326.14229	5
11	1207.64698	604.32713	S	465.19799	233.10263	4
12	1322.67393	661.84060	D	378.16596	189.58662	3
13	1419.72669	710.36698	P	263.13902	132.07315	2
14			F	166.08626	83.54677	1

## Sheet: DRG2
#1	b⁺	b²⁺	Seq.	y⁺	y²⁺	#2
1	116.03422	58.52075	D			14		Sequence: DVQPPGLKVWSDPF, F14-Amidated (-0.98402 Da)
2	215.10263	108.05496	V	1468.79471	734.90099	13		(DRG2) Charge: +2, Monoisotopic m/z: 792.41083 Da (-3.64 mmu/-4.59 ppm),MH+: 1583.81438 Da
3	343.16121	172.08424	Q	1369.72630	685.36679	12		RT: (DRG2)55.2424 min
4	440.21397	220.61063	P	1241.66772	621.33750	11		Identified with: Sequest HT (v1.17); XCorr: (DRG2) 2.50
5	537.26674	269.13701	P	1144.61496	572.81112	10		Fragment match tolerance used for search: 0.02 Da
6	594.28820	297.64774	G	1047.56219	524.28473	9		Fragments used for search: -H₂O; y; -NH₃; y; b; b; -H₂O; b; -NH₃; y
7	707.37227	354.18977	L	990.54073	495.77400	8
8	835.46723	418.23725	K	877.45666	439.23197	7
9	934.53564	467.77146	V	749.36170	375.18449	6
10	1120.61496	560.81112	W	650.29329	325.65028	5
11	1207.64698	604.32713	S	464.21397	232.61063	4
12	1322.67393	661.84060	D	377.18195	189.09461	3
13	1419.72669	710.36698	P	262.15500	131.58114	2
14			F-Amidated	165.10224	83.05476	1

## Sheet: DRG3
#1	b⁺	b²⁺	Seq.	y⁺	y²⁺	#2		Sequence: DVQPPGLKVWSDPF, F14-Amidated (-0.98402 Da)
1	116.03422	58.52075	D			14		(DRG3) Charge: +2, Monoisotopic m/z: 792.41718 Da (+2.71 mmu/+3.42 ppm), MH+: 1583.82707 Da
2	215.10263	108.05496	V	1468.79471	734.90099	13		RT: (DRG3) 58.0180 min
3	343.16121	172.08424	Q	1369.72630	685.36679	12		Identified with: Sequest HT (v1.17); XCorr: (DRG3) 2.24
4	440.21397	220.61063	P	1241.66772	621.33750	11		Fragment match tolerance used for search: 0.02 Da
5	537.26674	269.13701	P	1144.61496	572.81112	10		Fragments used for search: -H₂O; y; -NH₃; y; b; b; -H₂O; b; -NH₃; y
6	594.28820	297.64774	G	1047.56219	524.28473	9
7	707.37227	354.18977	L	990.54073	495.77400	8
8	835.46723	418.23725	K	877.45666	439.23197	7
9	934.53564	467.77146	V	749.36170	375.18449	6
10	1120.61496	560.81112	W	650.29329	325.65028	5
11	1207.64698	604.32713	S	464.21397	232.61063	4
12	1322.67393	661.84060	D	377.18195	189.09461	3
13	1419.72669	710.36698	P	262.15500	131.58114	2
14			F-Amidated	165.10224	83.05476	1
